# Supplementary material
Source: Springer Nature journal article supplement (https://www.springermedizin.de/resource/supplementary/12916_2010_296_MOESM2_ESM.pdf/9599576)
Supplement: MOESM2 [file 9599576]

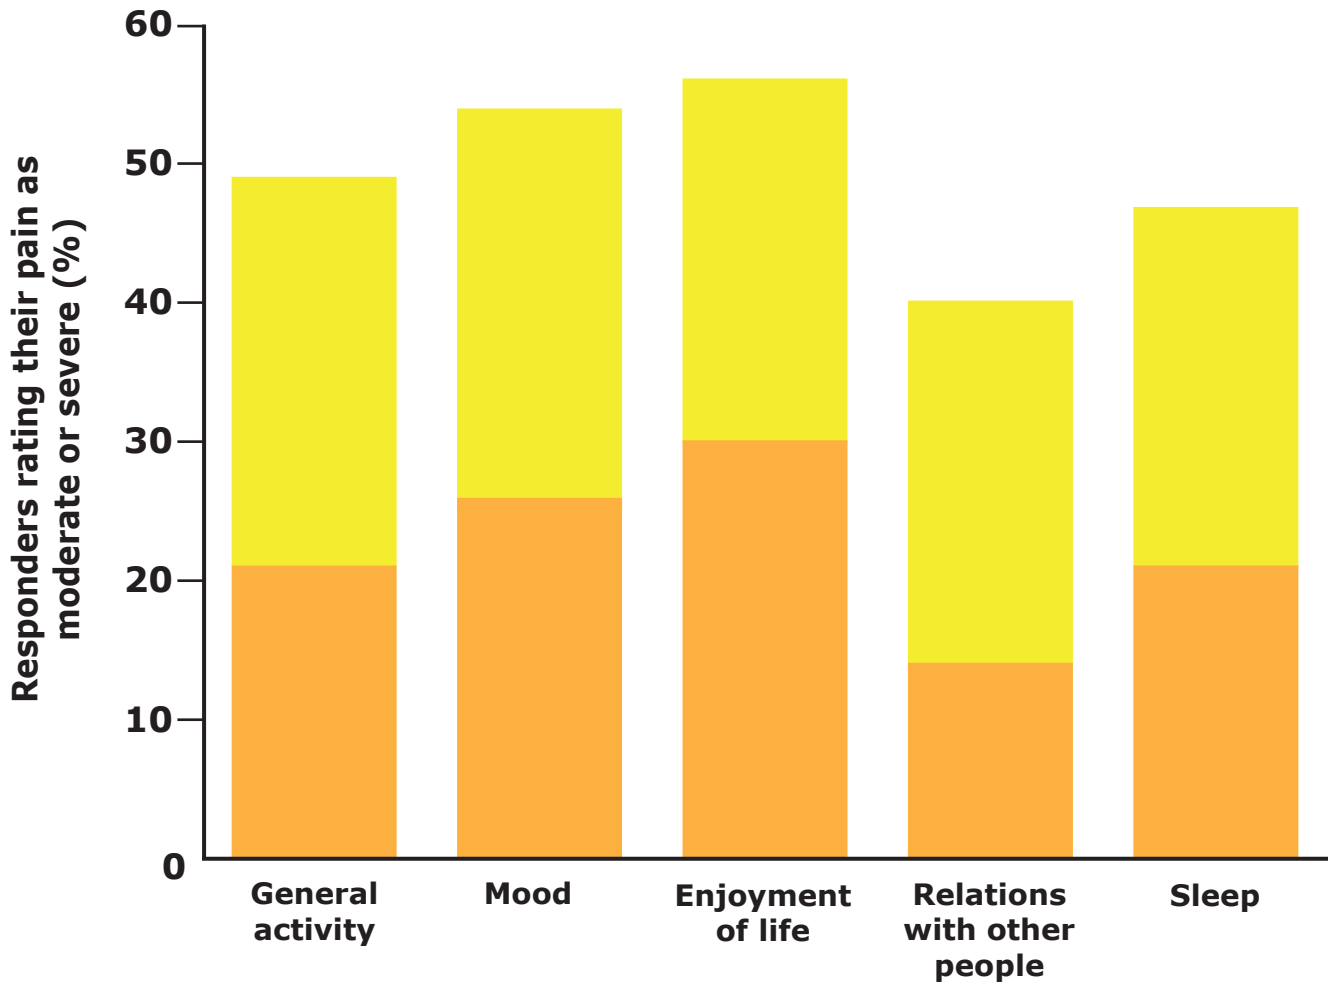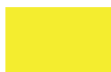

Moderate score (4-7)\*

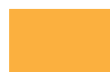

Severe score (8-10)\*

\*Scores based on a rating scale of 0 (no pain) to 10 (pain as bad as you can imagine)
